# Supplementary material for: Adiponectin Receptors and Pro-inflammatory Cytokines Are Modulated in Common Variable Immunodeficiency Patients: Correlation With Ig Replacement Therapy
Source: PubMed Central journal article supplement (PMC6890605; doi:10.3389/fimmu.2019.02812), 2019-11-27

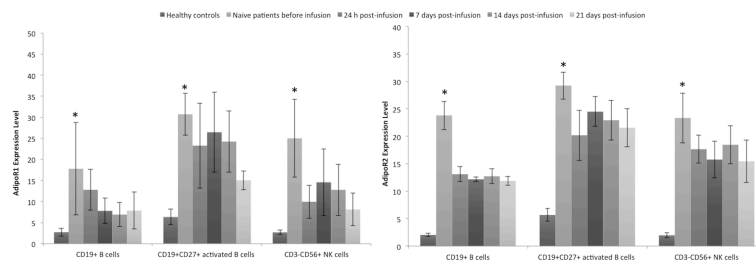

Supplement: Image_1.pdf [file Image_1.pdf]
